# Supplementary material
Source: publisher figshare collection journal article supplement (https://tandf.figshare.com/ndownloader/files/41524092)
Supplement: Supplementary file 1 [file 41524092]

Supplementary materials

Lapointe et al. 2023

Figure S1. Grain-size distribution (weight %) of the selected facies (1,2 5) and the overall datasets. Bottom: comparison between D50µm and the coarse silt weight (% 31-63µm) over the past ~1000 years.


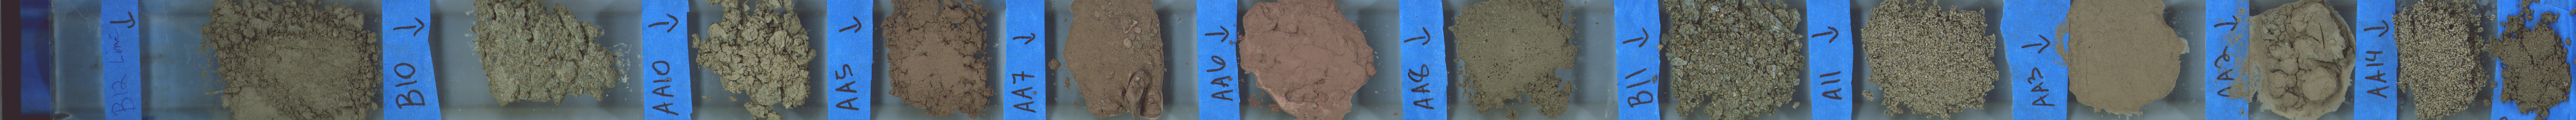

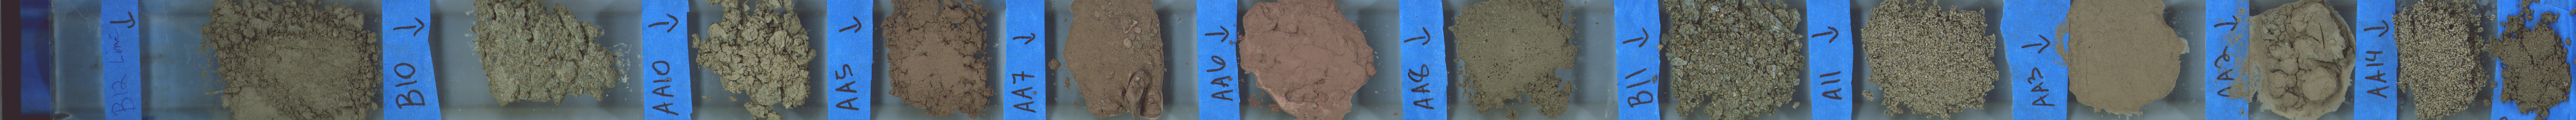


Figure S2. 14 Sediment samples collected around Linnévatnet among which 9 are mentioned in the main text.

Figure S3. Example of the well laminated section at Linnevatnet mooring C covering the 2001-1185CE.

Figure S4. In green are the uncalibrated ages with their uncertainty from site 06 (Snyder et al. 1994). Calibrated radiocarbon ages using OxCal20.

Figure S5. Same as Fig. 6A,B, but using the 9 elements retained.

Figure S6. Calcium (Ca) and Magnetic susceptibility (MS) throughout the 5m composite sequence. R = 0.42, p < 0.001


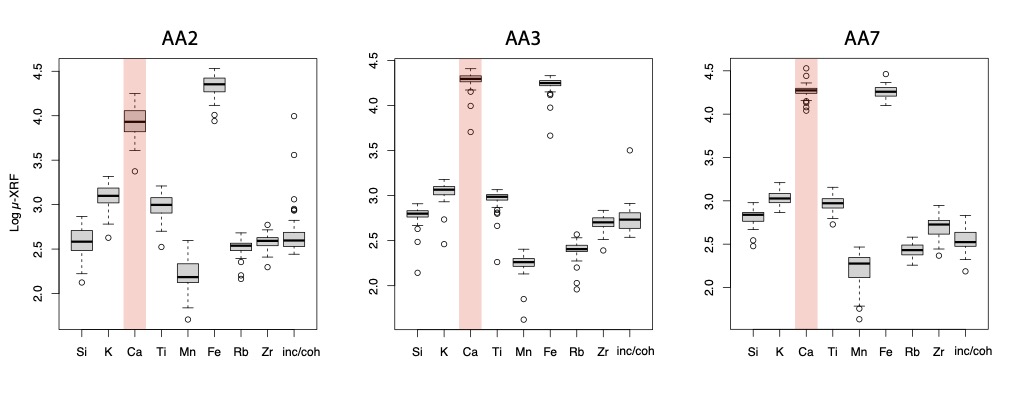


Figure S7. Same as Figure 9A, but µ-XRF expressed in log ratio.


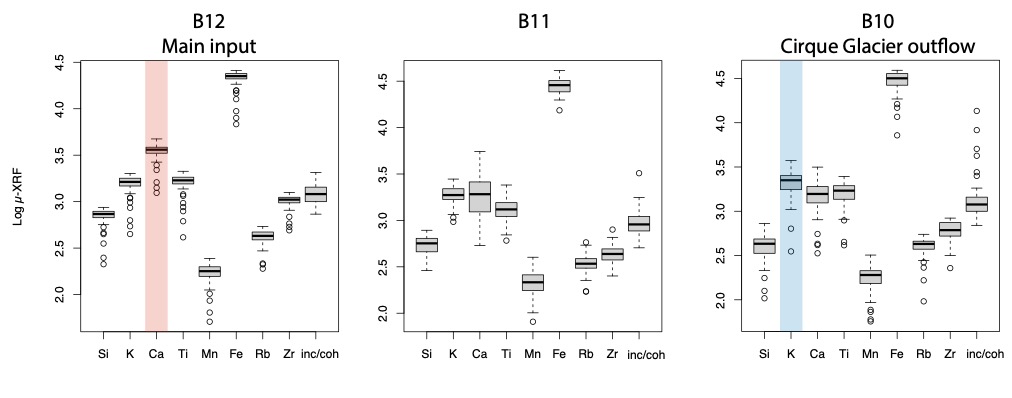


Figure S8. Same as figure 9B, but µ-XRF expressed in log ratio. Note the relatively high Ca values at the outlet of Linneelva (B12)


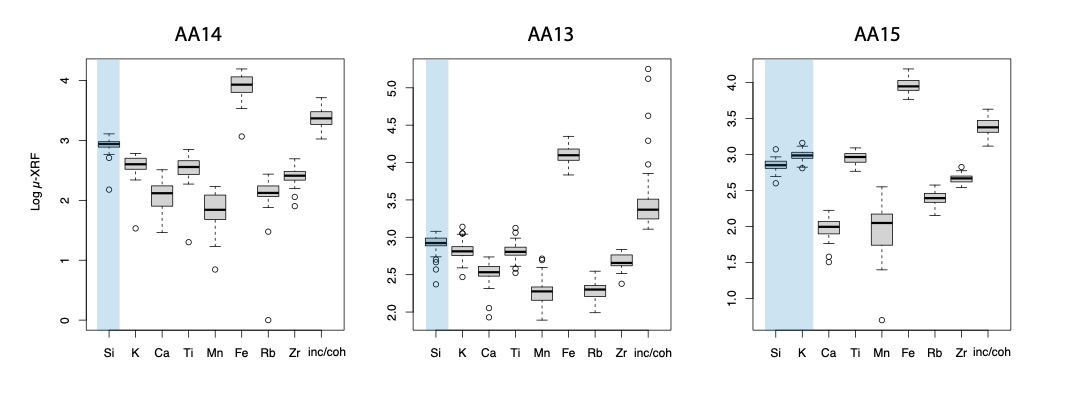


Figure S9. AA14, AA13, and AA15 sites on the western valley

Figure S10. Upper panel: Normalized Linnévatnet Calcium and δ18O from Lomonosovsfonna (DJF temperature) in Svalbard. Lower panel: same as upper panel, but Linnévatnet Calcium is compared to normalized December to February temperature from climate model Echo-G.

Figure S11. Upper panel: Spatial correlation between Echo-G temperature simulations and sea surface temperature from the Extended reanalysis SST. Lower panel: same as above but D50 at Linnévatnet correlated to SST.
